# Supplementary material
Source: Research Square preprint supplement (doi:10.21203/rs.3.rs-9927320/v1)
Supplement: Supplementary file 1 [file 7ea98bcbee8300c37cb983c2.docx]

**Table1** Primary antibodies information

| Target | Catalon No | supplier |
| --- | --- | --- |
| BPIFB1 | ab219098 | Abcam |
| CCL18 | ab300057 | Abcam |
| IGFBP2 | ab188200 | Abcam |
| WFDC2 | ab200828 | Abcam |
| GAPDH | ab181602 | Abcam |
